# Supplementary material
Source: MDPI journal article supplement (https://www.mdpi.com/2071-1050/13/13/7342)
Supplement: s1 [file s1 › sustainability-1240082-supplementary.pdf]

## Supplementary Information

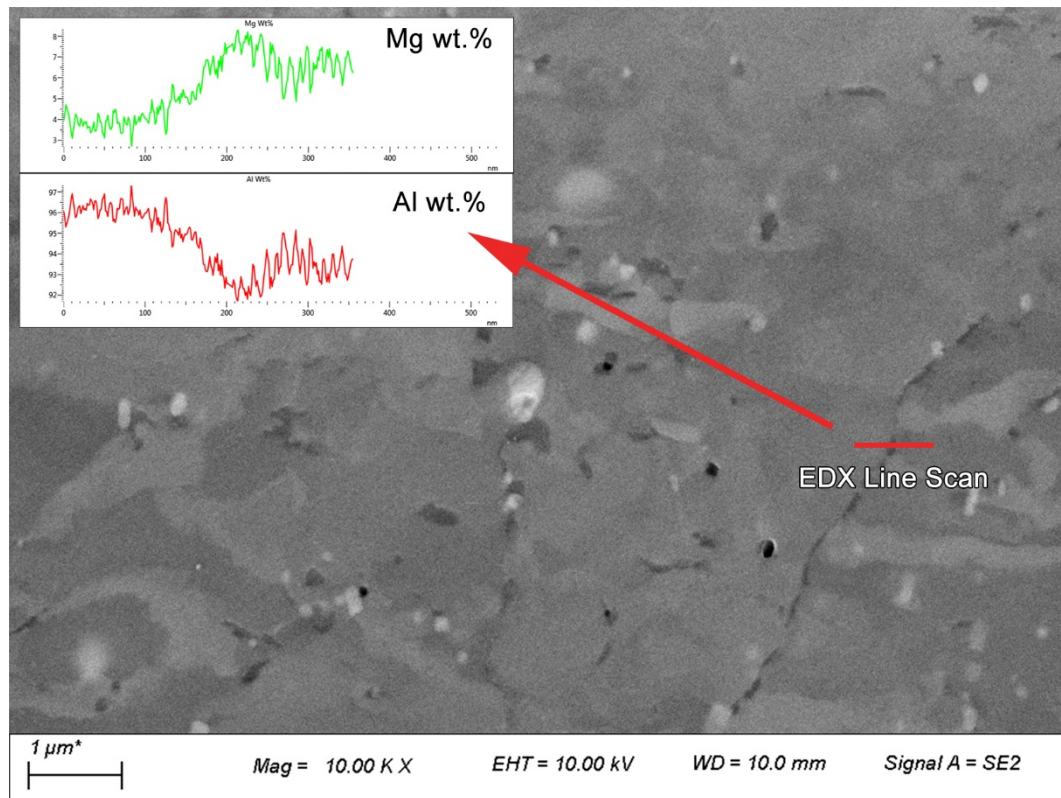

**Figure S1.** SEM/EDX analysis of the Mg enrichment along the grain boundaries, indicating the presence of  $\beta$ - $\text{Al}_3\text{Mg}_2$  phase.

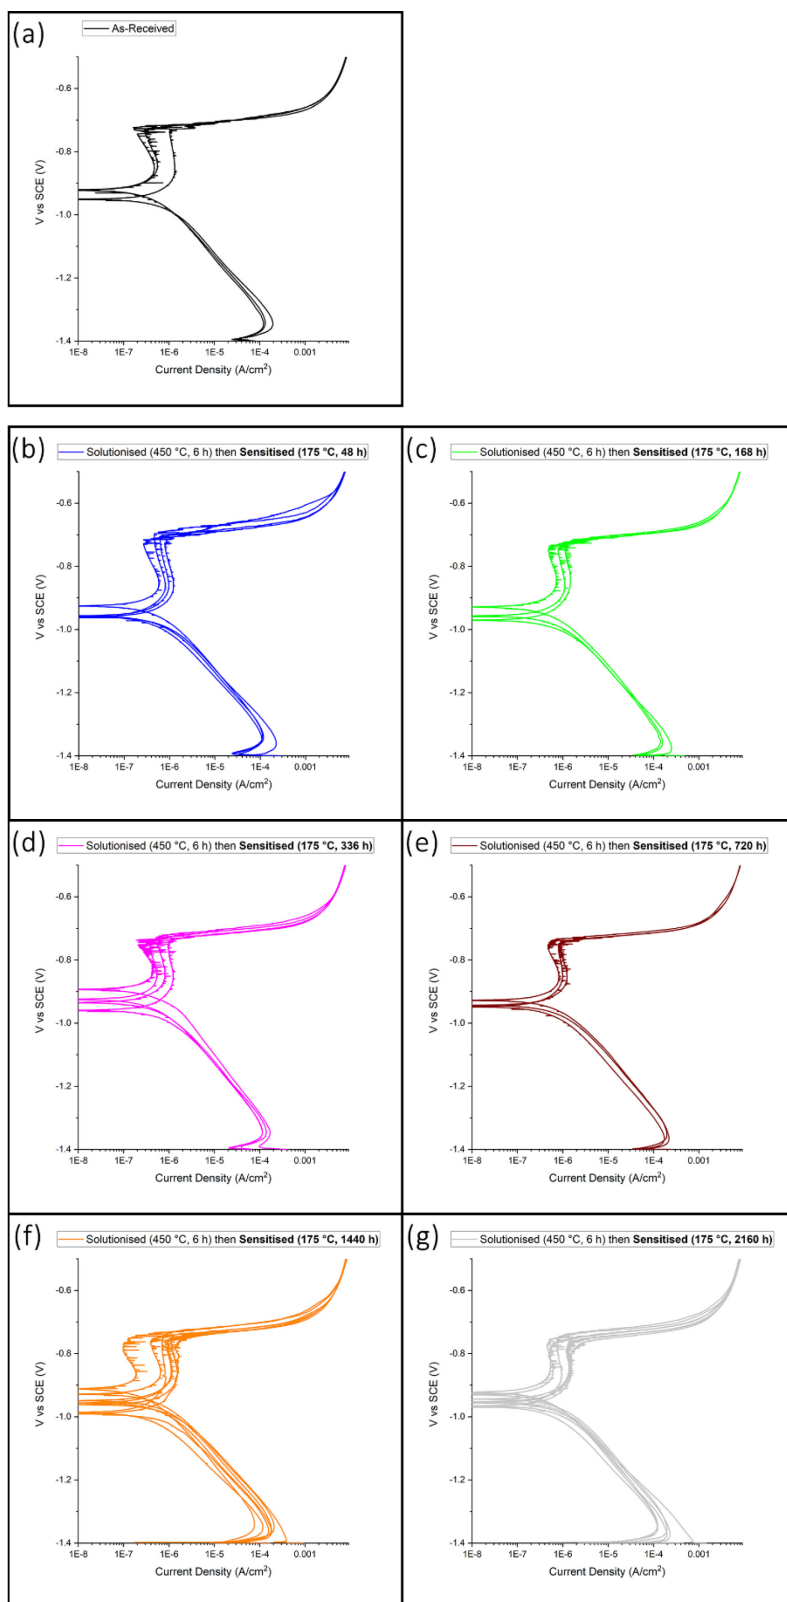

**Figure S2.** Potentiodynamic polarisation curves for the AA5083 (a) as-received microstructure, and the (b)-(g) sensitised microstructures in deaerated 3.5 wt.% NaCl electrolyte. The sensitised microstructures have undergone the additional isothermal heat treatment at 175 °C for (b) 48 hours, (c) 168 hours, (d) 336 hours, (e) 720 hours, (f) 1440 hours, and (g) 2160 hours. Each curve was done on a separate freshly-polished AA5083 sample.

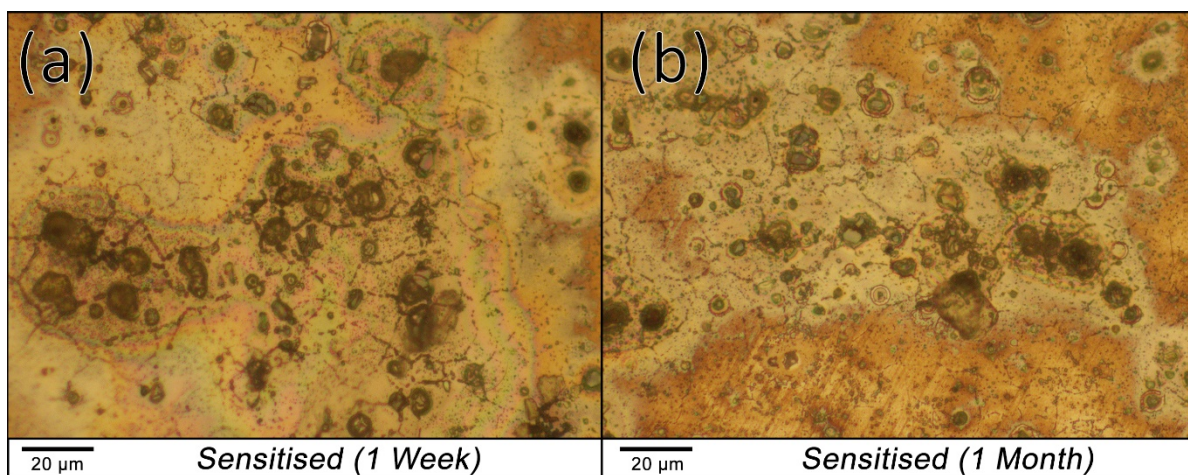

**Figure S3.** OM analysis of the sensitised AA5083 microstructure after the full potentiodynamic polarisation test (starting at -1.4 V vs SCE) for the isothermally heat-treated (a) 175 °C for 1 week sample, and the (b) 175 °C for 1 month sample.

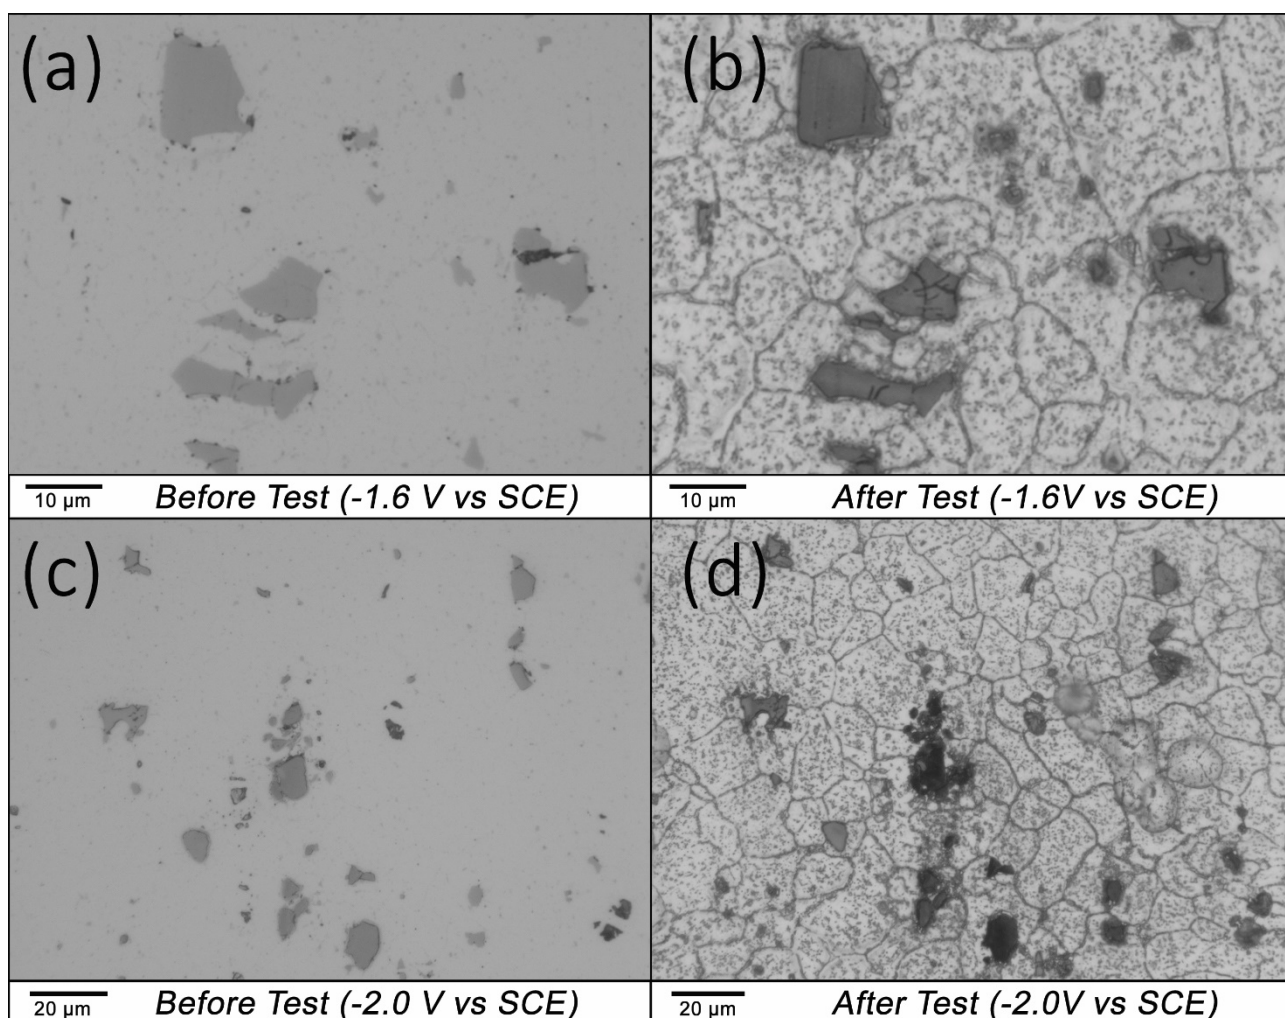

**Figure S4.** OM analysis of the AA5083 heavily sensitised (175 °C for 3 months) microstructure (a),(c) before and (b),(d) after the potentiostatic hold at (a),(b) -1.6 V vs SCE and at (c),(d) -2.0 V vs SCE.
